# Supplementary material
Source: PubMed Central journal article supplement (PMC4761482)
Supplement: NIHMS750391-supplement-1.pdf [file NIHMS750391-supplement-1.pdf]

# Supplementary Figure 1.

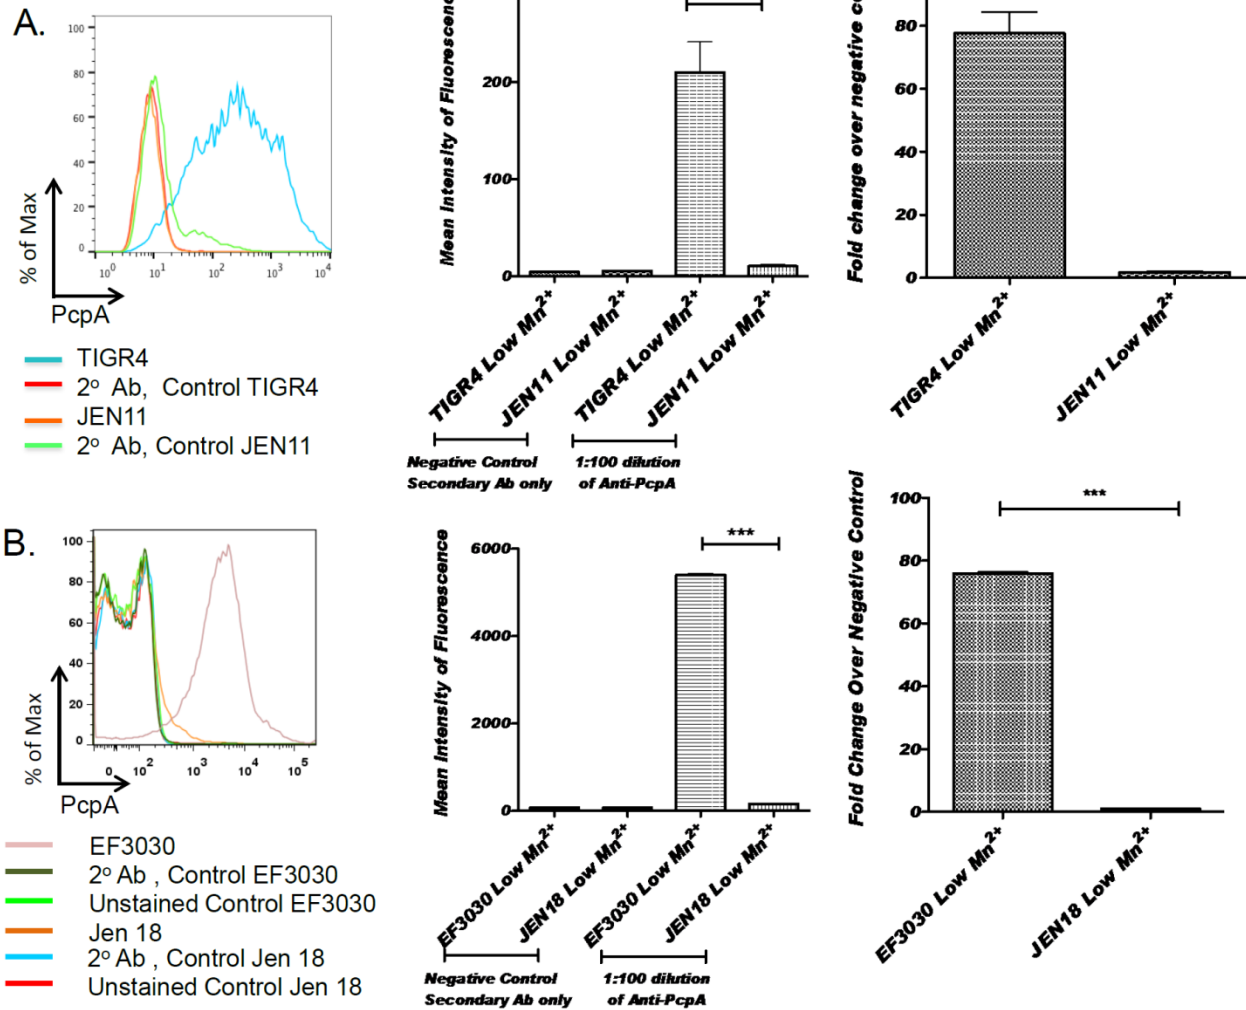

**Supplementary Figure 1:** PcpA expression is present in wild type TIGR4 and EF3030 strains and absent in PcpA mutant strains JEN11 and JEN18. (A) Overlaid histograms from flow cytometry analyses showing comparison of PcpA expression in the wild type TIGR4 and the PcpA mutant strain JEN11. Graphs represent average mean intensity of fluorescence derived from three replicate measurements of TIGR4 ( $*P < 0.0001$ ) and JEN11 compared to negative controls and fold change in TIGR4 ( $*P < 0.0001$ ) compared to JEN11 (B) Overlaid histograms from flow cytometry analyses showing comparison of PcpA expression in the wild type EF3030 and the PcpA mutant strain JEN18. Graphs represent average mean intensity of fluorescence derived from three replicate measurements of EF3030 ( $*P < 0.0001$ ) and JEN18 compared to negative controls and fold change in EF3030 ( $*P < 0.0001$ ) compared to JEN18.

Supplementary Fig. 2.

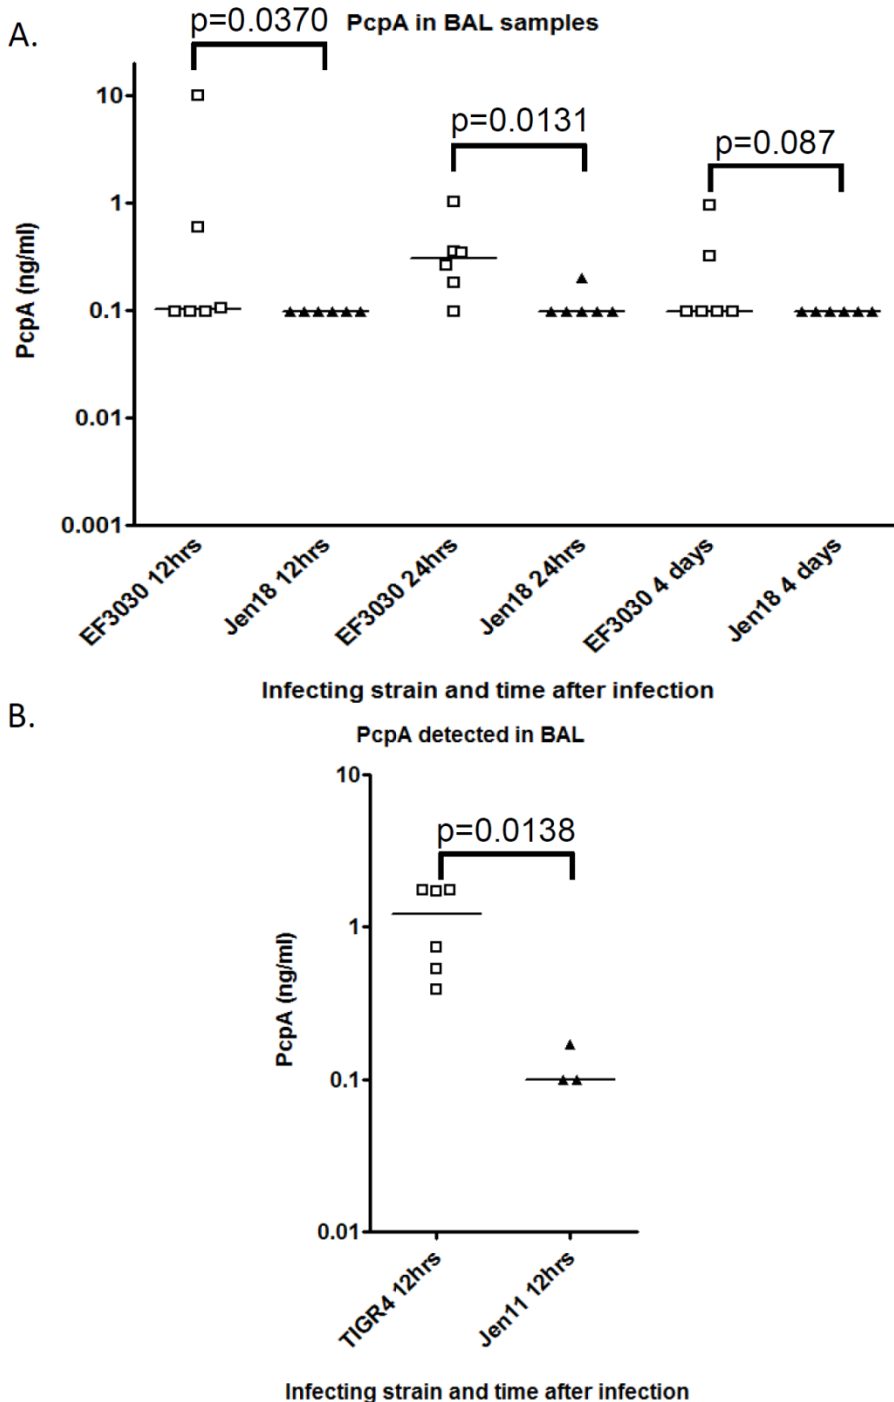

**Supplementary Figure 2: PcpA expression was confirmed *in vivo* in mice infected with wild type TIGR4 and EF3030 strains and *pcpA* mutant strains JEN11 and JEN18.**

(A) The PcpA capture ELISA shows significant reduction in PcpA levels in BAL fluid from mice infected with JEN 18 compared to EF3030 at three time points after infection. 0.1ng/ml was just below the level of detection of the capture ELISA. *P* values were calculated using Mann Whitney test. (B) PcpA capture ELISA shows significant reduction in PcpA levels in BAL fluid from mice infected with JEN 11 compared to EF3030 at 12 hours post infection. *P* values were calculated using Mann Whitney test. The horizontal bars represent medians.

### Supplementary Figure 3

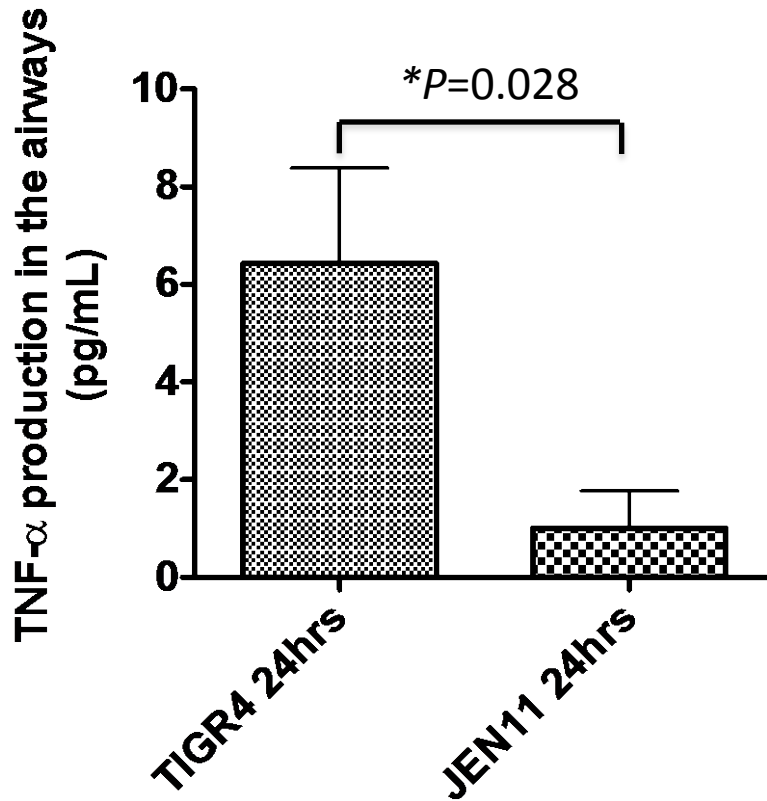

**Supplementary Figure 3:** TNF- $\alpha$  was reduced in BAL of mice infected with PcpA mutant strain JEN11 compared to wild type TIGR4. TNF- $\alpha$  was detected by ELISA in BAL fluid samples harvested from mice infected with TIGR4 and Jen11. Triplicate samples were measured from each of 7 mice in each group. The bars depict mean and standard error of the mean. *P* values were calculated using Mann Whitney test.
